# Supplementary material for: High quantum yield boron-doped carbon dots: a ratiometric fluorescent probe for highly selective and sensitive detection of Mg2+ ions
Source: Royal Society of Chemistry journal article supplement (doi:10.1039/d0tc05081d), 2020-12-10
Supplement: d0tc05081d1.pdf [file d0tc05081d1.pdf]

# **High Quantum Yield Boron-doped Carbon Dots: Ratiometric Fluorescent Probe for Highly Selective and Sensitive Detection of Mg<sup>2+</sup> ions**

Hari Krishna Sadhanala, # Sudhakar Pagidi, # Aharon Gedanken\*

*Department of Chemistry, Bar-Ilan Institute for Nanotechnology and Advanced Materials (BINA),  
Bar-Ilan-University, Ramat-Gan 52900, Israel*

# Authors contributed equally

\*Corresponding Author E-mail: [gedanken@biu.ac.il](mailto:gedanken@biu.ac.il) (A.G)

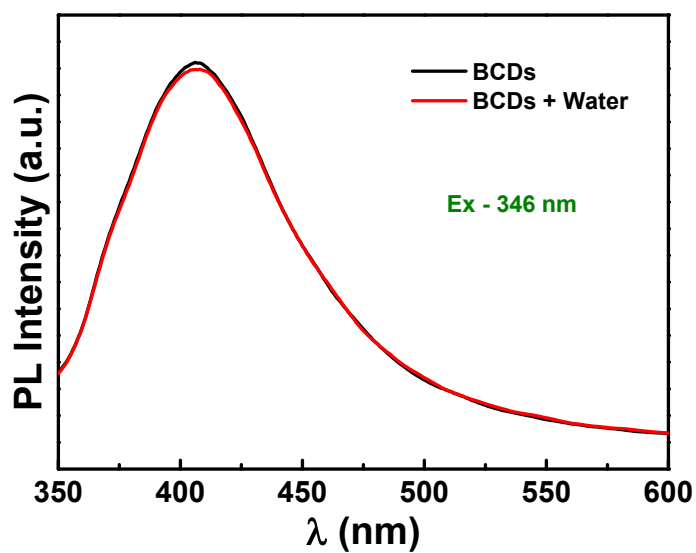

**Figure S1.** Fluorescence spectra of BCDs solution without and with 200  $\mu$ l of water content.

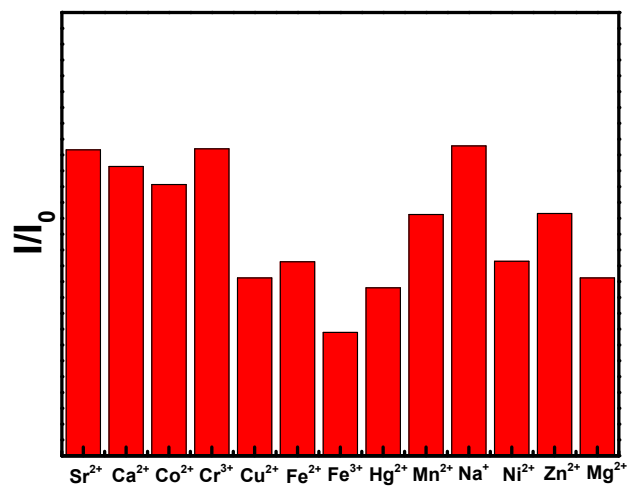

**Figure S2.** Selectivity of BCDs sensor towards different metal ions based on PL quenching at .

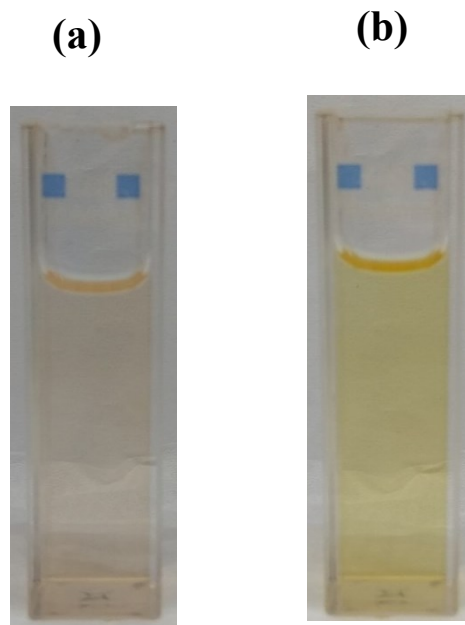

**Figure S3.** (a and b) Optical images of BCDs without and with  $Mg^{2+}$  ion.

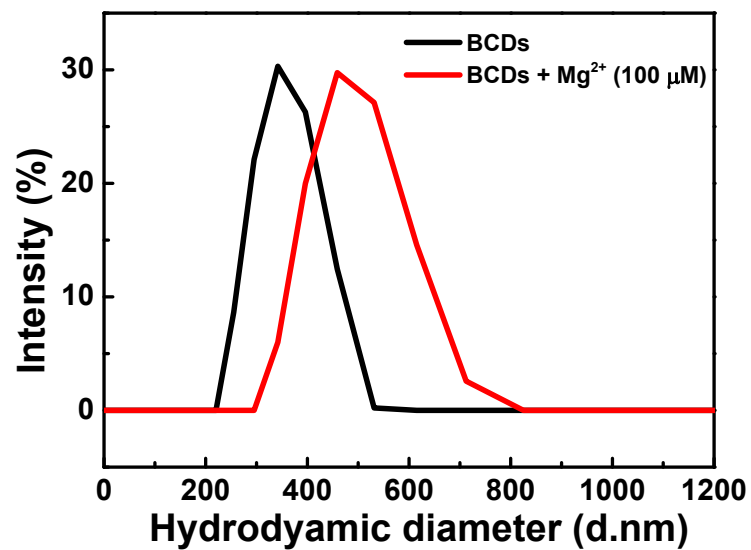

**Figure S4.** DLS spectra of BCDs without and with  $Mg^{2+}$  ion.

**Table S1.** Comparison of Mg<sup>2+</sup> ion sensing with different fluorescent probes

| <b>Sensing probes</b>         | <b>Fluorescence switch</b>  | <b>Detection limit</b>             | <b>Reference</b> |
|-------------------------------|-----------------------------|------------------------------------|------------------|
| calix[4]arene diamide         | Turn-on                     | 0.138 $\mu\text{M}$                | (1)              |
| DCHQ5                         | Turn-on                     | 0.2 $\mu\text{M}$                  | (2)              |
| PEBBLE Nanosensor             | Ratiometric emission        | 340 $\mu\text{M}$                  | (3)              |
| o - hydroxyl Schiff base      | Turn-on                     | 1.47 $\mu\text{M}$                 | (4)              |
| Coumarin-bispicolyamine (CBP) | Ratiometric emission        | 1 $\mu\text{M}$                    | (5)              |
| 1, 8-naphthalimide derivative | Turn off-Turn on            | 0.05 $\mu\text{M}$                 | (6)              |
| <b>BCDs</b>                   | <b>Ratiometric emission</b> | <b>39 <math>\mu\text{M}</math></b> | <b>This work</b> |

## References

1. K. C. Song, M. G. Choi, D. H. Ryu, K. N. Kim and S. K. Chang, *Tetrahedron Lett.*, 2007, **48**, 5397–5400.
2. A. Sargenti, G. Farruggia, N. Zaccheroni, C. Marraccini, M. Sgarzi, C. Cappadone, E. Malucelli, A. Procopio, L. Prodi, M. Lombardo and S. Iotti, *Nat. Protoc.*, 2017, **12**, 461–471.
3. E. J. Park, M. Brasuel, C. Behrend, M. A. Philbert and R. Kopelman, *Anal. Chem.*, 2003, **75**, 3784–3791.
4. T. Yu, P. Sun, Y. Hu, Y. Ji, H. Zhou, B. Zhang, Y. Tian and J. Wu, *Biosens. Bioelectron.*, 2016, **86**, 677–682.
5. J. Kang, H. K. Kang, H. Kim, J. Lee, E. J. Song, K. D. Jeong, C. Kim and J. Kim, *Supramol. Chem.*, 2013, **25**, 65–68.
6. H. zhang, C. Yin, T. Liu, J. Chao, Y. Zhang and F. Huo, *Dye. Pigment.*, 2017, **146**, 344–351.

**Table S2.** Comparison of lower detection limits of different methods for Mg<sup>2+</sup> ion

| Method                                      | Lower detection limit | Ref. |
|---------------------------------------------|-----------------------|------|
| Atomic absorption spectroscopy(AAS)         | 10 mM                 | 1    |
| ICP-MS                                      | 0.7 mM                | 2    |
| <sup>31</sup> P-NMR                         | 0.66 mM               | 3    |
| Null-point techniques                       | 0.33 mM               | 4    |
| Ion selective electrode                     | 0.1 mM                | 5    |
| Fluorescence spectrofluorometer (This work) | 0.075 mM              |      |

### References

1. M. Liu, X. Yu, M. Li, N. Liao, A. Bi, Y. Jiang, S. Liu, Z. Gong, and W. Zeng, *RSC Adv.*, 2018, 8, 12573-12587.
2. J. M. Harrington, D. J. Young, A. S. Essader, S. J. Sumner, and K. E. Levine, *Biol. Trace Elem. Res.*, 2014, **160**, 132–142.
3. W. Zhang, A. C. Truttman, D. Lüthi, and J. A. S. McGuigan, *Anal. Biochem.*, 1997, **251**, 246–250.
4. B. E. Corkey, J. Duszynski, T. L. Rich, B. Matschinsky, and J. R. Williamson, *J. Biol. Chem.*, 1986, **261**, 2567–2574.
5. P. Flatman and V. L. Lew, *Nature*, 1977, **267**, 360–362.
